## Position Statement

# Dietary exposures and allergy prevention in high-risk infants

Elissa M. Abrams, Julia Orkin, Carl Cummings, Becky Blair, Edmond S. Chan

Canadian Paediatric Society, Community Paediatrics Committee and Allergy Section; Canadian Society of Allergy and Clinical Immunology; Dietitians of Canada

**Correspondence:** Canadian Paediatric Society, 100–2305 St Laurent Blvd, Ottawa, Ontario K1G 4J8, Canada. E-mail [info@cps.ca](mailto:info@cps.ca), website [www.cps.ca](http://www.cps.ca)

**This position statement is being co-published by the Canadian Paediatric Society and by the Canadian Society of Allergy and Clinical Immunology.**

For the full text document, visit [www.cps.ca/en/documents](http://www.cps.ca/en/documents)

Infants at high risk for developing a food allergy have either an atopic condition (such as eczema) themselves or an immediate family member with such a condition. Breastfeeding should be promoted and supported regardless of issues pertaining to food allergy prevention, but for infants whose mothers cannot or choose not to breastfeed, using a specific formula (i.e., hydrolyzed formula) is not recommended to prevent food allergies. When cow's milk protein formula has been introduced in an infant's diet, make sure that regular ingestion (as little as 10 mL daily) is maintained to prevent loss of tolerance. For high-risk infants, there is compelling evidence that introducing allergenic foods early—at around 6 months, but not before 4 months of age—can prevent common food allergies, and allergies to peanut and egg in particular. Once an allergenic food has been introduced, regular ingestion (e.g., a few times a week) is important to maintain tolerance. Common allergenic foods can be introduced without pausing for days between new foods, and the risk for a severe reaction at first exposure in infancy is extremely low. Pre-emptive in-office screening before introducing allergenic foods is not recommended. No recommendations can be made at this time about the role of maternal dietary modification during pregnancy or lactation, or about supplementing with vitamin D, omega 3, or pre- or probiotics as means to prevent food allergy.

**Keywords:** *Breastfeeding; Food allergy; Infants*

## CANADIAN PAEDIATRIC SOCIETY COMMUNITY PAEDIATRICS COMMITTEE (2020-2021)

**Members:** Tara Chobotuk MD, Carl Cummings MD (past Chair), Michael Hill MD, Audrey Lafontaine MD, Alisa Lipson MD, Marianne McKenna MD (Board Representative), Julia Orkin MD (Chair), Larry Pancer (past Member)

**Liaisons:** Peter Wong MD, CPS Community Paediatrics Section

## CANADIAN PAEDIATRIC SOCIETY ALLERGY SECTION (2020-2021)

**Executive members:** Elissa M. Abrams MD MPH (President), Edmond S. Chan MD (Secretary-treasurer)

**Principal authors:** Elissa M. Abrams MD MPH, Julia Orkin MD, Carl Cummings MD, Becky Blair MSc RD, Edmond S. Chan MD

Received: October 28, 2019; Accepted: January 15, 2021

This article has been co-published with permission in Paediatrics & Child Health and Allergy, Asthma & Clinical Immunology. © Canadian Paediatric Society, and The Author(s), 2021. All rights reserved. Published by Oxford University Press on behalf of the Canadian Paediatric Society, and by Springer Nature on behalf of the Canadian Society of Allergy and Clinical Immunology. The articles are identical, except for minor stylistic and spelling differences in keeping with each journal's style. Either citation can be used when citing this article.

This is an Open Access article distributed under the terms of the Creative Commons Attribution-NonCommercial License (<https://creativecommons.org/licenses/by-nc/4.0/>), which permits non-commercial re-use, distribution, and reproduction in any medium, provided the original work is properly cited. For commercial re-use, please contact [journals.permissions@oup.com](mailto:journals.permissions@oup.com)

---

**CANADIAN SOCIETY OF ALLERGY AND CLINICAL IMMUNOLOGY, PEDIATRIC INTEREST SECTION**

*Elissa M Abrams MD MPH, Wade Watson MD MEd, Tim Vander Leek MD, Adelle Atkinson MD, Marie-Noel Primeau MD, Marie-Josée Francoeur MD, Mary McHenry MD, Elana Lavine MD, Edmond S. Chan MD*

**DIETITIANS OF CANADA**

*Maude Perreault RD PhD, Brock Williams MSc RD, Jen Yates RD*
